# Supplementary material
Source: Research Square preprint supplement (doi:10.21203/rs.3.rs-8956144/v1)
Supplement: Supplementary file 1 [file c8cb6ac67099644af2405a28.xlsx]

## Sheet: Sheet1
		Diagnosis	M/F		NPD							Negative Lead 1
	criteria-2	CT	Female										Female	CT	COPD
	2		Female		no pulm disease								Female
	2	PFT	Female	gold2									Female
	2	PFT	Female	gold4									Female
	2	PFT	Female	gold2									Female
	2	CT	Female			GMT							Female	gold2	COPD	GMT
	2	CT	Female										Female
	2	PFT	Female	gold2									Female
	3	PFT	Female	gold4									Female
	2	CT	Female										Female
	2	PFT	Female	gold2									Female	gold1	COPD	GMT
	2	CT	Female										Female
	2	CT	Female										Female
	2		Female		restrictive lung disease								Female	CT	COPD
	2	PFT	Female	gold4									Female
	3		Female		no pulm disease								Female
	3	CT	Female										Female
	2		Female		restrictive lung disease								Female
	3	PFT	Female	gold2									Female
	2	PFT	Female	gold3									Female
	2	CT	Female										Female
	2	CT	Female										Female
	2	PFT	Female	gold3									Female
	2	PFT	Female	gold2									Female
	2		Female		no pulm disease								Female
	2	PFT	Female	gold3									Female
	3	CT	Female										Female
	2	CT	Female			GMT							Female
	2	PFT	Female	gold3									Female
	2	PFT	Female	gold4									Female
	2	PFT	Female	gold3									Female
	3	PFT	Female	gold2									Female
	2		Female		no pulm disease								Female
	2	CT	Female										Female
	2	CT	Female										Female
	2	PFT	Female	gold3									Female
	2	CT	Female										Female
	3	CT	Female										Female
	2	CT	Female										Female
	3	CT	Female										Female
	2		Female		no pulm disease								Female
	2	CT	Female										Female
	2		Female		no pulm disease								Female	CT	COPD
	2		Female		no pulm disease								Female
	2	CT	Female										Female
	2	CT	Female										Female
	3	PFT	Female	gold2									Female
	2	PFT	Female	gold4									Female
	2	CT	Female										Female
	2	CT	Female										Female
	2		Female		no pulm disease								Female	gold2	COPD	GMT
													Female
													Female
	3	PFT	Male	gold4
	2	CT	Male										Male
	2	CT	Male										Male	CT	COPD
	2	PFT	Male	gold1		NGMT							Male
	2	CT	Male										Male
	2	PFT	Male	gold2									Male
	3	CT	Male										Male	CT	COPD
	2		Male		no pulm disease								Male
	2	PFT	Male	gold2									Male
	2		Male		no pulm disease								Male
	3	CT	Male										Male
	2	CT	Male										Male
	2		Male		no pulm disease								Male
	3	CT	Male										Male
	2	PFT	Male	gold2									Male
	2	PFT	Male	gold3									Male
	3	CT	Male										Male
	2	CT	Male										Male
	2	CT	Male										Male
	2	PFT	Male	gold3									Male
	3	PFT	Male	gold4									Male
	2		Male		no pulm disease								Male
	2	CT	Male										Male
	3		Male		no pulm disease								Male	gold1	COPD	GMT
	3	CT	Male										Male
	2	PFT	Male	gold1									Male
	2	PFT	Male	gold4									Male
	2	PFT	Male	gold3		NGMT							Male
	2	PFT	Male	gold3									Male
	2	PFT	Male	gold4									Male
	3	PFT	Male	gold2									Male
	3	CT	Male										Male
	2	CT	Male										Male
	3	CT	Male										Male
	3	CT	Male										Male
	2		Male		no pulm disease								Male
	2	CT	Male			GMT							Male
	3	PFT	Male	gold4									Male
	2	CT	Male										Male
	2	PFT	Male	gold4									Male	gold2	COPD	GMT
	2	PFT	Male	gold2									Male
	2	PFT	Male	gold3									Male
	2	CT	Male										Male
	3	PFT	Male	gold2									Male
	3	PFT	Male	gold2									Male
													Male
													Male
													Male
													Male
													Male
													Male
													Male	CT	COPD
													Male	gold2	COPD	GMT
